# Supplementary material for: Red blood cell Raman microscopy: modelling sub-cellular biochemistry
Source: Royal Society of Chemistry journal article supplement (doi:10.1039/d5cp00172b), 2025-01-01

Supplementary Information

**Red blood cell Raman microscopy: modelling sub-cellular biochemistry**

Victor V. Volkov,a Joanna Aizenberg,b and Carole C. Perry*a

*aInterdisciplinary Biomedical Research Centre, School of Science and Technology, Nottingham Trent University, Clifton Lane, Nottingham, United Kingdom NG11 8NS*

*bJohn A. Poulson School of Engineering and Applied Sciences, Harvard University, 29 Oxford Street, Cambridge, United States MA 02138*


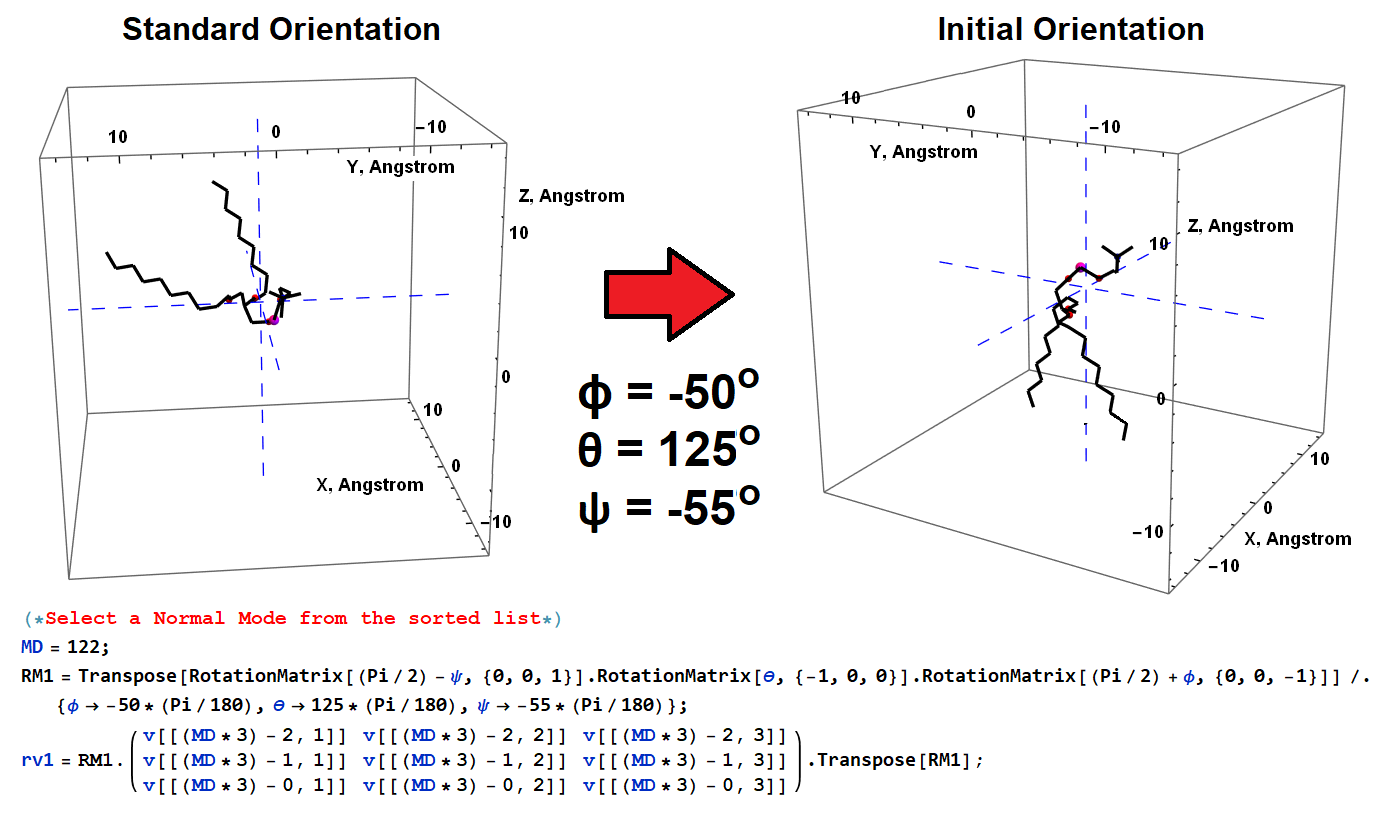


**Figure S1**. Rotation of phospholipid molecule from Standard to Initial orientation and a Mathematica code to transform Raman tensor of mode 122 correspondingly.

Mathematica notebook


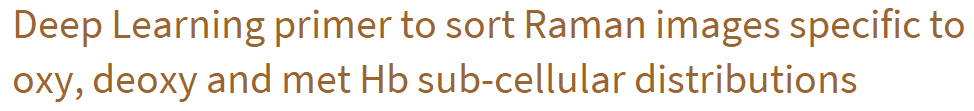


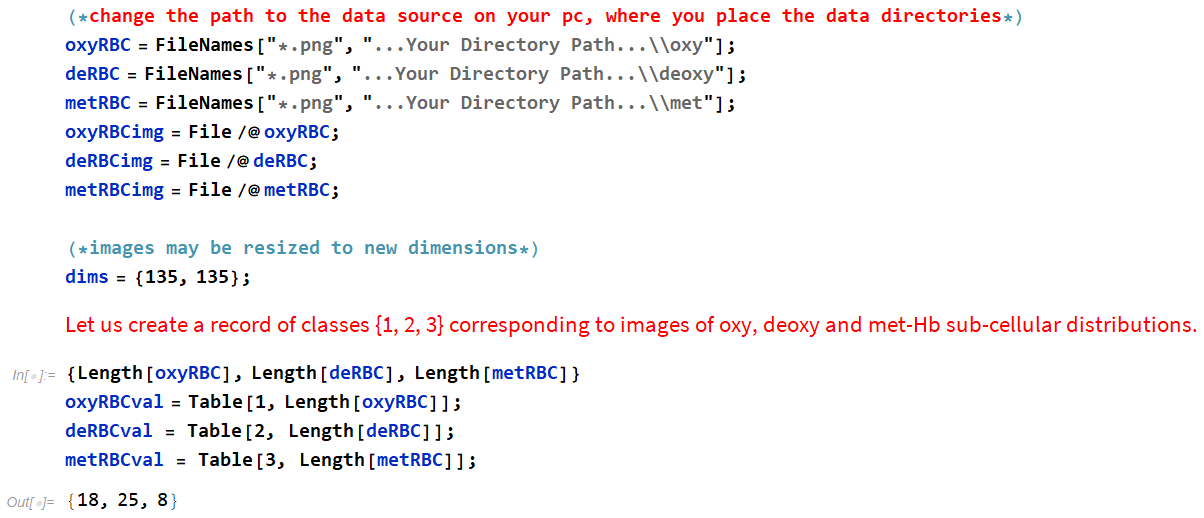


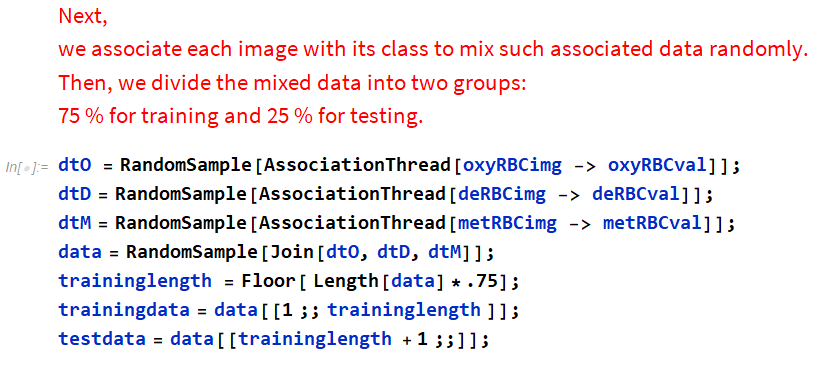


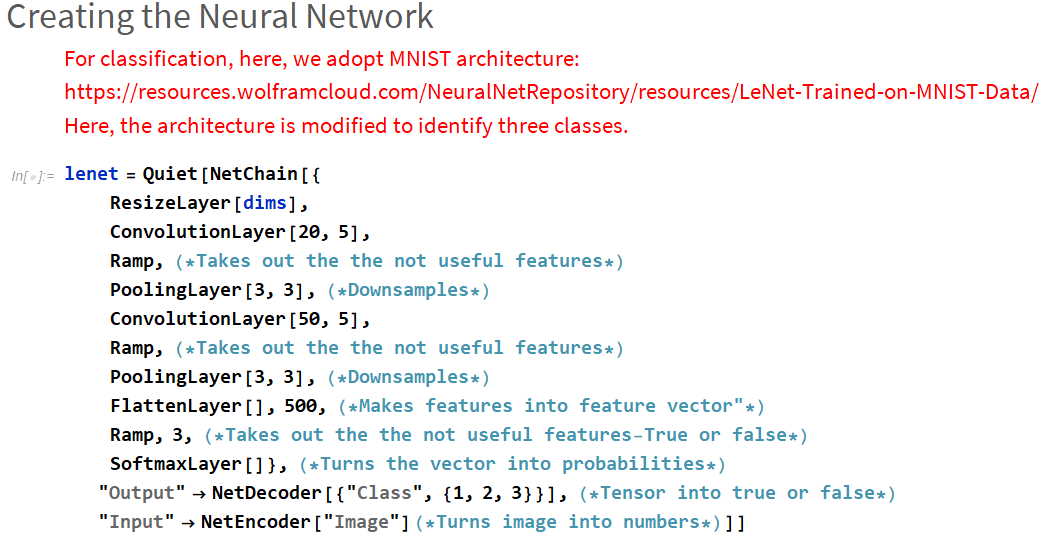


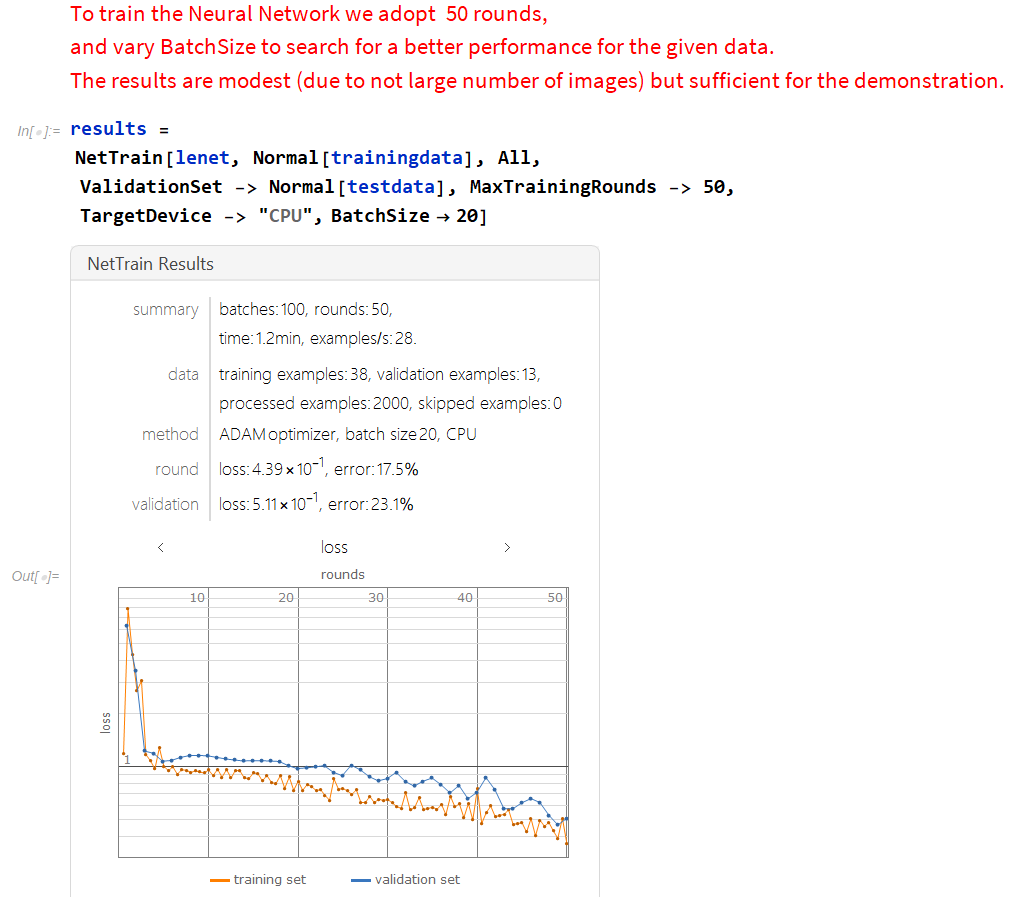


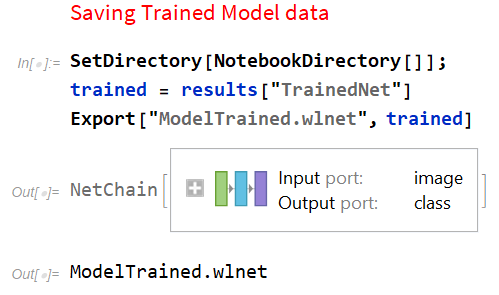


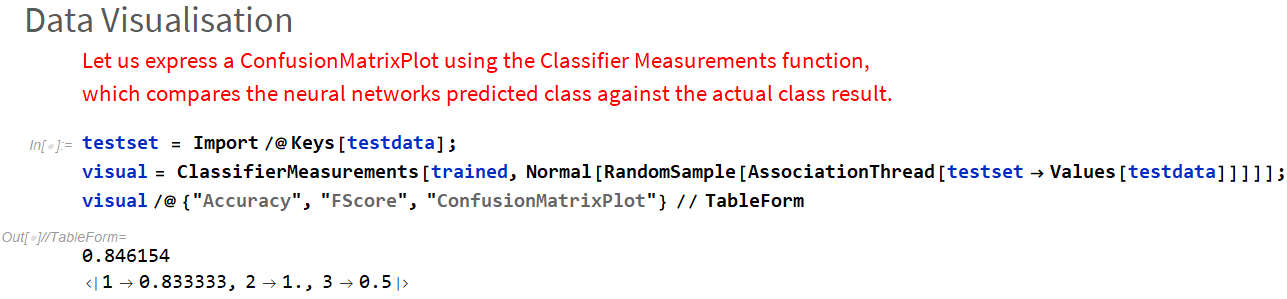


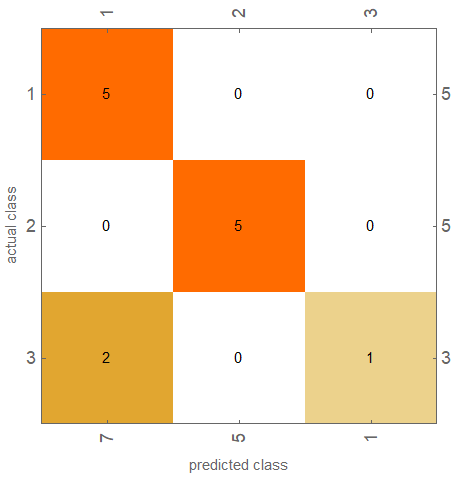


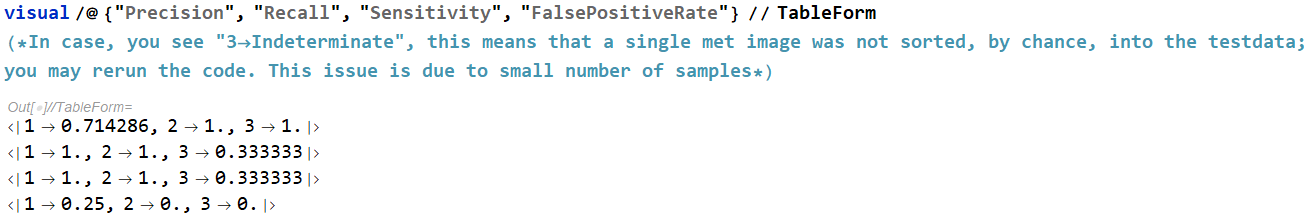

Supplement: d5cp00172b1.zip [file d5cp00172b1.zip]
